# Supplementary material for: DispHred: A Server to Predict pH-Dependent Order–Disorder Transitions in Intrinsically Disordered Proteins
Source: PubMed Central journal article supplement (PMC7461198; doi:10.3390/ijms21165814), 2020-08-13
Supplement: ijms-21-05814-s001.pdf [file ijms-21-05814-s001.pdf]

## Supplementary Figure S1:

Evaluation of the pH-Pro-corrected hydropathy scale. (A) Correlation between pH-Pro-corrected hydropathy scale and IDP-hydropathy scale. (B) ROC curve analysis of the performance of pH-dependent and pH-Pro-corrected hydropathy scales in discriminating a dataset of a fully disordered (n=111) and single-chain folded (n=150) proteins.

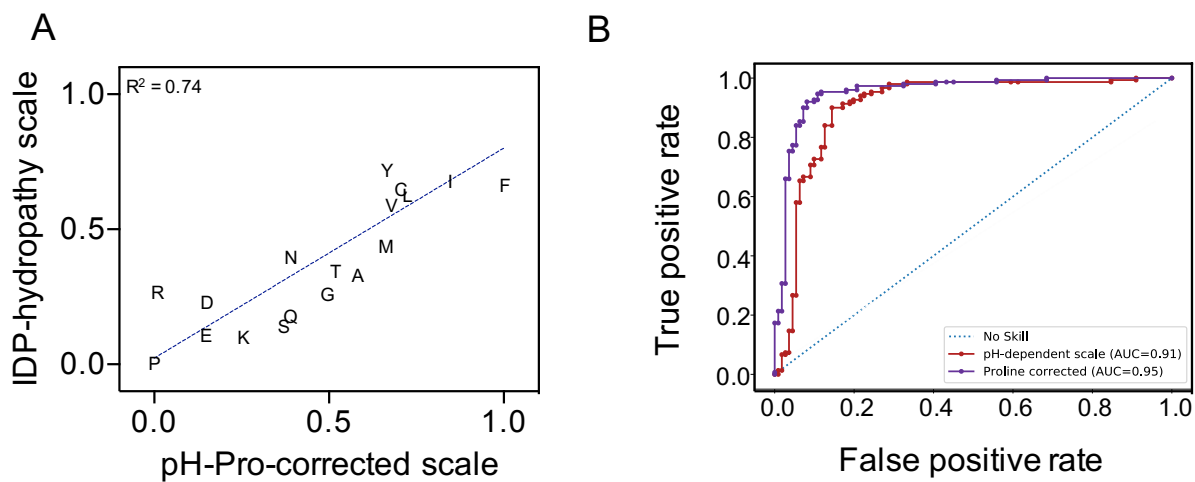

## Supplementary Figure S2:

C-H plots of Ac-AKAAKAKAAKAKAAKA-NH2 (**A**), a 36-loop region of the influenza hemagglutinin (**B**), A-domain of the Toc132 receptor (**C**), LL-37 (**D**) and human histones (**E**). Solid line delimits folded-unfolded boundary condition. Blue and orange data points correspond to bibliographically unfolded and folded conditions, respectively. Open circles represent the same points considering a constant hydrophobicity (pH 7).

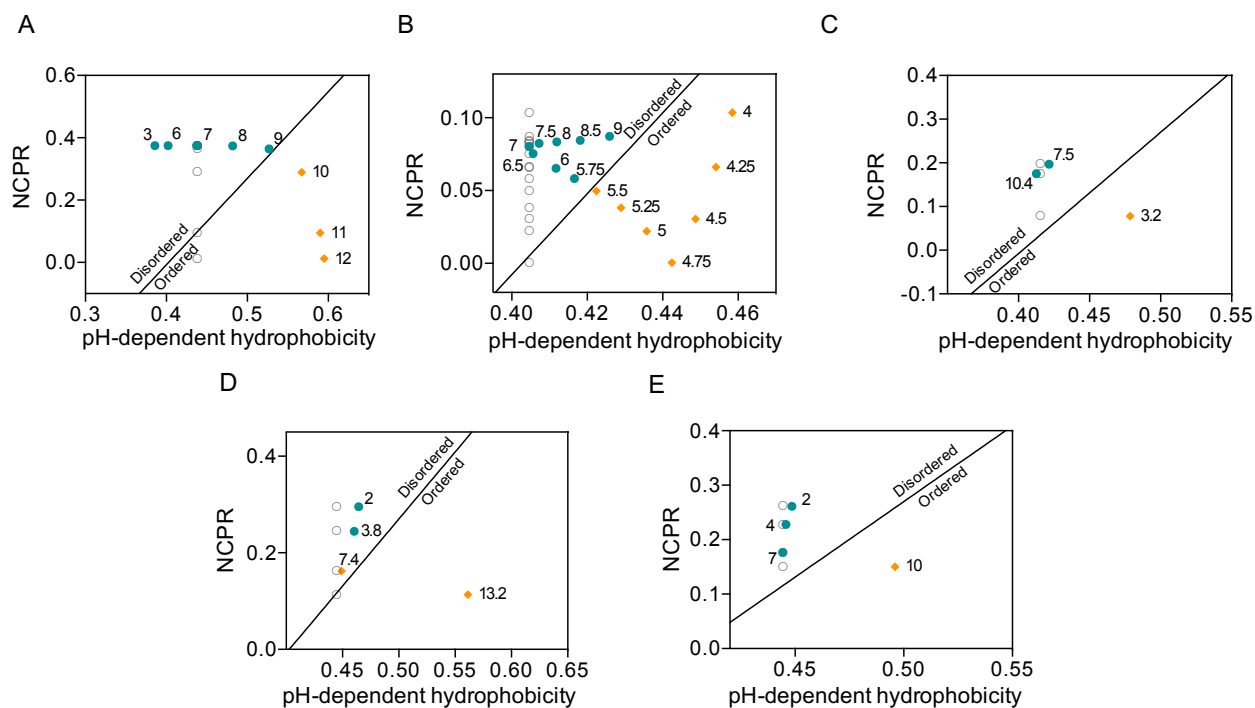

### Supplementary Figure S3:

SVM-based classification of pH-conditioned ordered-disordered protein sequences based on their C-H relation. (A, B) C-H plots containing 59 datapoints; 35 labeled as disordered (blue) and 24 as folded (orange). Each point is defined by its calculated NCPR and its mean hydrophobicity at their experimental pH (A) or neutral pH (B). The solid line represents the optimal boundary condition, whereas dashed lines delimitate the maximum margin.

A

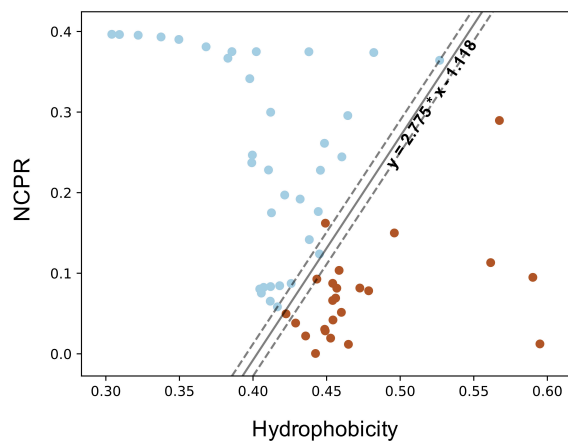

B

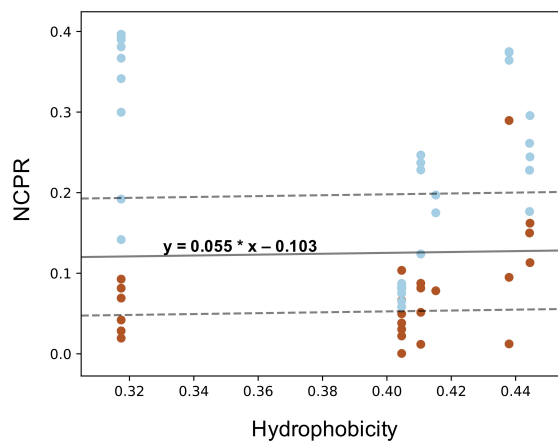

## Supplementary Table S1:

111 fully disordered proteins and 150 single-chain folded proteins used to evaluate the discriminatory performance of the hydropathy scales.

| <b>Disprot identifier (disorder proteins)</b> | <b>PDB ID (Folded proteins)</b> |
|-----------------------------------------------|---------------------------------|
| DP00667                                       | 5RDH                            |
| DP00325                                       | 2GU9                            |
| DP00661                                       | 1IDP                            |
| DP02205                                       | 1NKO                            |
| DP01431                                       | 5DMD                            |
| DP00584                                       | 3CJW                            |
| DP01946                                       | 1RAT                            |
| DP00592                                       | 1RH9                            |
| DP01300                                       | 1LZ1                            |
| DP01425                                       | 1TGN                            |
| DP00219                                       | 4L1H                            |
| DP00068                                       | 1WOU                            |
| DP00587                                       | 3FY3                            |
| DP00040                                       | 2PAB                            |
| DP00871                                       | 1R3F                            |
| DP00042                                       | 5J7E                            |
| DP00689                                       | 1TGL                            |
| DP01945                                       | 2FEM                            |
| DP00645                                       | 2JFF                            |
| DP00329                                       | 6N8U                            |
| DP00878                                       | 4JAR                            |
| DP00146                                       | 1ACX                            |
| DP01786                                       | 1ALD                            |
| DP00663                                       | 1BOL                            |
| DP01512                                       | 21BI                            |
| DP00214                                       | 1SUR                            |

---

|         |      |
|---------|------|
| DP00057 | 1ILT |
| DP00041 | 1J8Y |
| DP01435 | 2BLM |
| DP01146 | 3CBH |
| DP00664 | 2O71 |
| DP01509 | 1BRY |
| DP00047 | 1K2P |
| DP00877 | 1ND7 |
| DP00929 | 2RBL |
| DP00694 | 1TIA |
| DP01521 | 6EXR |
| DP00116 | 1R6F |
| DP01942 | 6K3H |
| DP01087 | 4YXX |
| DP02167 | 1FEW |
| DP01293 | 1FIM |
| DP01088 | 1FTS |
| DP00132 | 1BGT |
| DP00070 | 1BSF |
| DP01677 | 1PCL |
| DP01299 | 1KON |
| DP01295 | 1SMT |
| DP01148 | 2BTZ |
| DP00140 | 3DXF |
| DP00008 | 3IF0 |
| DP00657 | 2GE8 |
| DP00626 | 5E7I |
| DP01071 | 2V71 |
| DP00546 | 3I4H |
| DP00534 | 1QMN |
| DP01386 | 3JYM |

---

---

|         |      |
|---------|------|
| DP00630 | 1C79 |
| DP01381 | 1QDM |
| DP02066 | 1WVI |
| DP00815 | 1ERK |
| DP01488 | 2RIG |
| DP00253 | 1U2J |
| DP01876 | 2ILA |
| DP02299 | 2GZR |
| DP00112 | 1H6J |
| DP01383 | 1QTR |
| DP01074 | 6H2E |
| DP00005 | 6RJX |
| DP00028 | 2INT |
| DP01385 | 4ZWQ |
| DP00015 | 5L0O |
| DP00288 | 3MFM |
| DP00027 | 6H1W |
| DP02267 | 1HRH |
| DP01382 | 1ANG |
| DP00118 | 1WVW |
| DP01069 | 1OYS |
| DP01060 | 1LSG |
| DP00164 | 1M4C |
| DP01035 | 1VF7 |
| DP00555 | 6Q64 |
| DP00221 | 6QBP |
| DP01860 | 5EGK |
| DP01801 | 3MC2 |
| DP01388 | 4UQF |
| DP00795 | 4V2F |
| DP01101 | 2PPI |

---

---

|         |          |
|---------|----------|
| DP02320 | 2NS7     |
| DP01384 | 2AAK     |
| DP00973 | 2FVZ     |
| DP00540 | 2EOO     |
| DP00163 | 5X0O     |
| DP00530 | 6IGT     |
| DP00951 | 5ZHY     |
| DP01378 | 1CZD     |
| DP00940 | 4.00E+61 |
| DP01969 | 3QIR     |
| DP01787 | 2ALR     |
| DP02321 | 4IQA     |
| DP01833 | 4.00E+16 |
| DP01025 | 5TDQ     |
| DP00017 | 6BDC     |
| DP00372 | 1G62     |
| DP01789 | 1GSC     |
| DP02078 | 1GWZ     |
| DP01971 | 1HMC     |
| DP00521 | 1IDF     |
| DP00563 | 1AJA     |
| DP00205 | 1BVU     |
| DP01559 | 1CHG     |
|         | 1RCU     |
|         | 1RHD     |
|         | 1RLR     |
|         | 1K3F     |
|         | 1N3X     |
|         | 1NF1     |
|         | 6ISB     |
|         | 171L     |

---

---

4I82

3P6A

6HFG

2AW5

3DPA

3DKB

2XSS

3LZ2

3KFW

3APM

3GPN

3HDU

5MQO

3V9G

3SQ3

3IA0

4V2D

4V2E

5C21

5AY9

2OWY

1TIM

2NRO

2HSG

2J5U

2FXO

2EQL

5YBX

6AHO

1XI8

3B8J

---



**Supplementary Table 2.** Performance of the pH-independent hydrophobicity model derived by SVM in Supplementary Figure S3 in predicting order-disorder transitions in a C-H plot analysis. Unfolded sequences correctly predicted to be unfolded were classified as true positives.

| <b>Measure</b>                   | <b>pH-independent hydrophobicity SVM analysis</b> |
|----------------------------------|---------------------------------------------------|
| Sensitivity                      | 0.74                                              |
| Specificity                      | 0.88                                              |
| Precision                        | 0.90                                              |
| False Discovery rate             | 0.08                                              |
| Accuracy                         | 0.8                                               |
| F1 Score                         | 0.81                                              |
| Matthews Correlation Coefficient | 0.60                                              |
